# Supplementary material for: Enhanced chemiluminescence of the luminol-hydrogen peroxide system by BSA-stabilized Au nanoclusters as a peroxidase mimic and its application
Source: Royal Society of Chemistry journal article supplement (doi:10.1039/c3ay42135j), 2014-01-01
Supplement: c3ay42135j1.pdf [file c3ay42135j1.pdf]

**Enhanced chemiluminescence of the luminol-hydrogen peroxide system by  
BSA-stabilized Au nanoclusters as peroxidase mimic and its application**

Mao Deng, Funan Chen\* and Shuangjiao Xu

The Key Laboratory of Luminescence and Real-time Analysis, Ministry of Education;  
School of Chemistry and Chemical Engineering, Southwest University, Chongqing,

China 400715

**Contact information for Corresponding Author**

Associate Professor Fu-nan Chen, School of Chemistry and Chemical Engineering,  
Southwest University, Chongqing, 400715, P.R. China

Fax: 86-23-68258363. Tel: +86-13752919874

E-mail: [chenfn@swu.edu.cn](mailto:chenfn@swu.edu.cn)

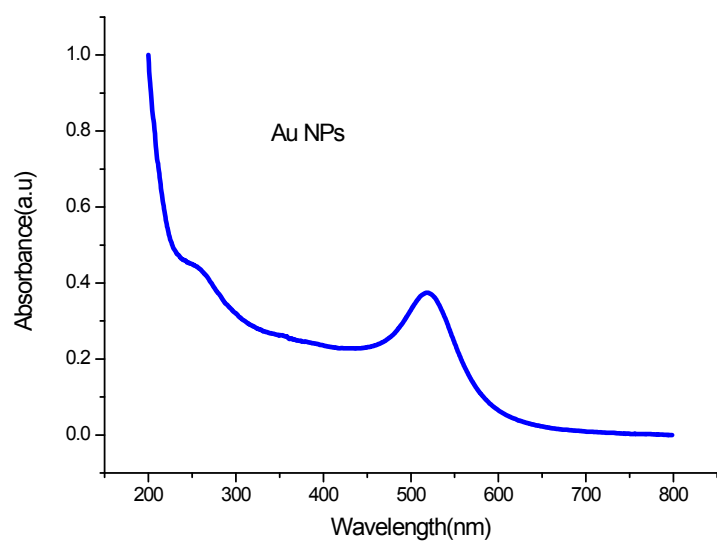

**Figure S1.** UV-vis absorption spectra of BSA-protected gold nanoparticles.

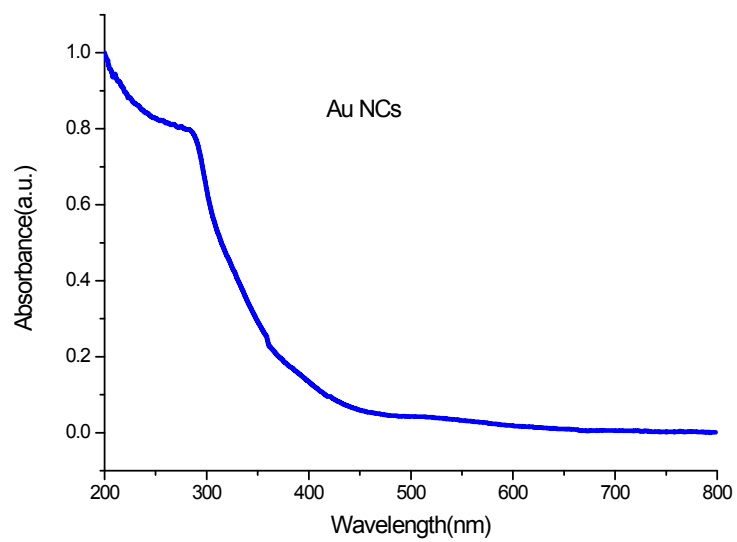

**Figure S2.** UV-vis absorption spectra of BSA-protected gold nanoclusters.

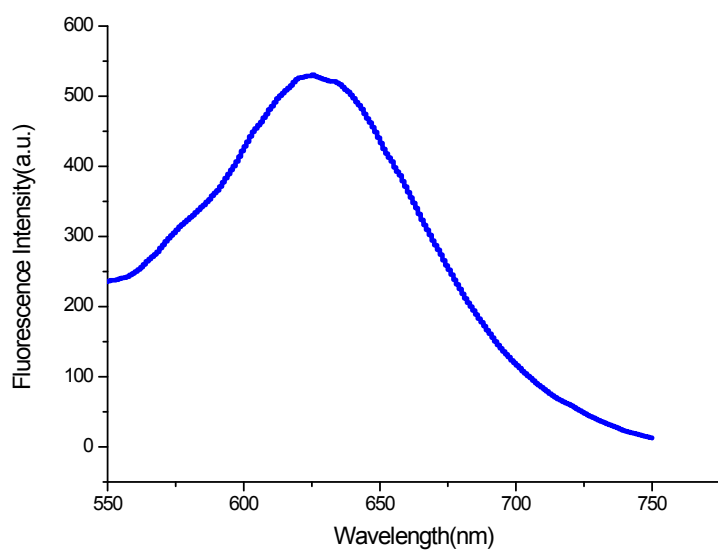

**Figure S3.** Emission intensity of gold nanoclusters at 470 nm excitation.
